# Supplementary material
Source: Elsevier journal article supplement (https://www.sciencedirect.com/science/article/pii/S253104371930131X)
Supplement: mmc1 [file S253104371930131X:mmc1.docx]

| ***PRAISE*** | **Índice de Auto-eficácia adaptado para Reabilitação Respiratória[[1]](#footnote-2)** |
| --- | --- |
| *Pulmonary Rehabilitation Adapted Index of Self-Efficacy[[2]](#footnote-3)* |

| Por favor assinale como se sente actualmente: | 1 - De modo nenhum é verdade  2 - Dificilmente é verdade  3 - Moderadamente verdade  4 - Exactamente verdade | | | | |
| --- | --- | --- | --- | --- | --- |
| *Consigo resolver sempre os problemas difíceis se for persistente.* | | 1 | 2 | 3 | 4 |
| *Se alguém se opuser, consigo encontrar os meios e as formas de alcançar o que quero.* | | 1 | 2 | 3 | 4 |
| *Para mim é fácil agarrar-me às minhas intenções e atingir os meus objectivos.* | | 1 | 2 | 3 | 4 |
| *Estou confiante que consigo caminhar uma boa distância, ao meu ritmo, embora fique sem fôlego.* | | 1 | 2 | 3 | 4 |
| *Estou confiante que poderia lidar eficientemente com acontecimentos inesperados.* | | 1 | 2 | 3 | 4 |
| *Graças aos meus recursos, sei como lidar com situações imprevistas.* | | 1 | 2 | 3 | 4 |
| *Sinto-me confiante que vou conseguir fazer os exercícios que me serão pedidos ao longo da reabilitação, mesmo que os ache difíceis.* | | 1 | 2 | 3 | 4 |
| *Consigo resolver a maioria dos problemas se investir o esforço necessário.* | | 1 | 2 | 3 | 4 |
| *Sinto que tenho um conhecimento adequado sobre a minha doença pulmonar, embora seja um problema de saúde complexo.* | | 1 | 2 | 3 | 4 |
| *Perante dificuldades consigo manter a calma porque confio nas minhas capacidades.* | | 1 | 2 | 3 | 4 |
| *Quando confrontado(a) com um problema, consigo geralmente encontrar várias soluções.* | | 1 | 2 | 3 | 4 |
| *Estou seguro(a) de conseguir completar os exercícios em casa, embora não tenha a supervisão de um profissional de saúde.* | | 1 | 2 | 3 | 4 |
| *Se estiver com problemas, consigo geralmente pensar numa solução.* | | 1 | 2 | 3 | 4 |
| *Consigo geralmente lidar com tudo aquilo que me surge pelo caminho.* | | 1 | 2 | 3 | 4 |
| *Sinto que no dia-a-dia controlo a minha doença pulmonar e a forma como afecta o meu estilo de vida, mesmo quando os sintomas se tornam mais angustiantes.* | | 1 | 2 | 3 | 4 |
|  | |  |  |  |  |
| *Índice de Auto-Eficácia* ***PRAISE*** | |  | | | |

1. Santos C, Santos AJ, Santos M, Rodrigues F, Bárbara C. Pulmonary Rehabilitation Adapted Index of Self-Efficacy (PRAISE) validated to Portuguese respiratory patients. Pulmonology 2019; x(x):x-x. [↑](#footnote-ref-2)
2. Vincent E, Sewell L, Wagg K, Deacon S, Williams J, Singh S. Measuring a change in self-efficacy following pulmonary rehabilitation: an evaluation of the PRAISE tool. Chest. 2011;140(6):1534-9. [↑](#footnote-ref-3)
